# Supplementary material for: Studies on continuous selective hydrogenolysis of glycerol over supported Cu–Co bimetallic catalysts
Source: Royal Society of Chemistry journal article supplement (doi:10.1039/c9nj04945b), 2020-01-01
Supplement: c9nj04945b1.pdf [file c9nj04945b1.pdf]

**Studies on continuous selective hydrogenolysis of glycerol over supported Cu-Co bimetallic catalysts**

Narsinga. Raju, Voggu. Rekha, Burri. Abhishek, Peddagolla. Mahesh Kumar, Chenna Sumana, Nakka. Lingaiah\*

Department of Catalysis & Fine Chemicals, CSIR-Indian Institute of Chemical Technology, Hyderabad-500 007, Telangana, India.

**Supporting Information: New Journal of Chemistry**

**Table S1. Glycerol hydrogenolysis activity of Cu-Co/Al<sub>2</sub>O<sub>3</sub> catalysts**

| Catalysts                                | Glycerol  | Selectivity (%) |      |        |        |
|------------------------------------------|-----------|-----------------|------|--------|--------|
|                                          | Conv. (%) | 1,2-PDO         | E.G  | Acetol | Others |
| 10Cu/Al <sub>2</sub> O <sub>3</sub>      | 45.3      | 62.5            | 2.6  | 32.5   | 2.4    |
| 10Cu-3Co/Al <sub>2</sub> O <sub>3</sub>  | 32.4      | 65.6            | 2.9  | 28.4   | 3.1    |
| 10Cu-5Co/Al <sub>2</sub> O <sub>3</sub>  | 48.3      | 72.4            | 3.7  | 20.4   | 3.5    |
| 10Cu-7Co/Al <sub>2</sub> O <sub>3</sub>  | 56.8      | 78.5            | 3.6  | 14.2   | 3.7    |
| 10Cu-10Co/Al <sub>2</sub> O <sub>3</sub> | 43.2      | 71.6            | 5.8  | 18.8   | 3.8    |
| 10Cu-13Co/Al <sub>2</sub> O <sub>3</sub> | 36.4      | 64.8            | 8.4  | 22.4   | 4.4    |
| 10Co/Al <sub>2</sub> O <sub>3</sub>      | 24.2      | 32.4            | 46.2 | 13.2   | 8.2    |

**Reaction Conditions:** Glycerol concentration: 20 wt.%, Reaction Temperature: 200 °C, Catalyst weight: 1g and LHSV: 5 h<sup>-1</sup> (6ml).
